# Supplementary material
Source: publisher figshare collection journal article supplement (https://gsajournals.figshare.com/articles/dataset/_/13308476)
Supplement: Supplementary file 1 [file 1]

**Table S7:**

| <b>GO Set:</b>                 | <b>GO Term (GO ID)</b>                            | <b>Names of genes affected</b>                                                                                                                                                                                                                                                                                                                                                                                                                                 |
|--------------------------------|---------------------------------------------------|----------------------------------------------------------------------------------------------------------------------------------------------------------------------------------------------------------------------------------------------------------------------------------------------------------------------------------------------------------------------------------------------------------------------------------------------------------------|
| <b>Yeast GO-Slim process</b>   | cell wall organization or biogenesis (GO:0071554) | <i>AMA1, AVO2, CDA1, CDA2, CRZ1, CSR2, DAN1, DIT1, DIT2, DON1, DSE1, DSE2, ECM11, ECM12, ECM13, ECM23, ECM4, ECM8, FAT3, FIG2, FKS3, FMP45, GAS1, GAS2, GAS4, GSC2, HLR1, IRC18, LDS1, LDS2, LOH1, NCA3, OSW1, PAU10, PAU11, PAU12, PAU13, PAU15, PAU16, PAU2, PAU20, PAU21, PAU22, PAU23, PAU24, PAU3, PAU4, PAU5, PAU6, PAU7, PFS1, PIR3, PIR5, PRS1, PSA1, SCW11, SHC1, SPI1, SPS1, SPS100, SPS2, SPS22, SUN4, TEP1, TIR2, TIR4, UTR2, YNL194C, YOR365C</i> |
| <b>Yeast GO-Slim component</b> | Cell wall (GO:0005618)                            | <i>AGA1, ANS1, DAN1, DIA3, DSE2, DSE4, EGT2, FIG1, FIG2, FIT1, FIT2, FIT3, FLO1, FLO10, FLO11, FLO5, GAS1, GAS2, GAS4, HSP82, LDS1, LDS2, NCA3, OSW1, PAU10, PAU11, PAU12, PAU13, PAU15, PAU16, PAU2, PAU20, PAU21, PAU22, PAU23, PAU24, PAU3, PAU4, PAU5, PAU6, PAU7, PHO12, PIR3, PIR5, SAG1, SCW11, SPI1, SPO19, SPR2, SPR28, SPR3, SPS2, SPS22, SUN4, TDH2, TIR2, TIR4, UTR2, ZPS1</i>                                                                     |
