# Supplementary material
Source: publisher figshare collection journal article supplement (https://gsajournals.figshare.com/articles/dataset/_/13308476)
Supplement: Supplementary file 2 [file 1]

**A**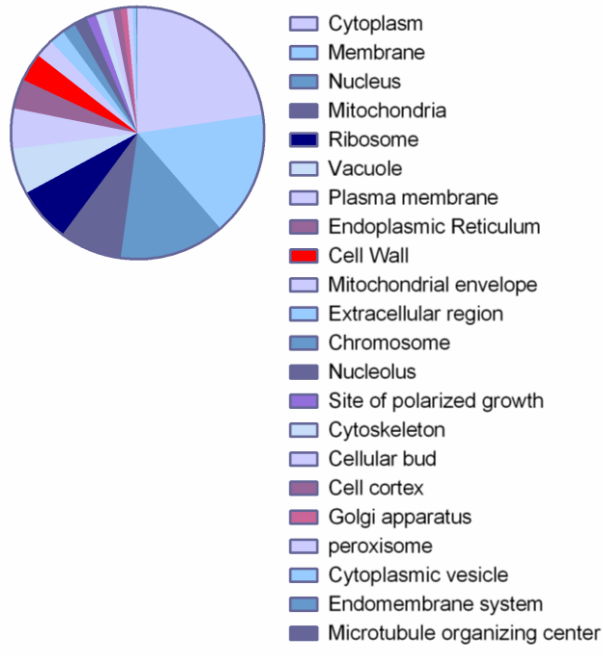**B**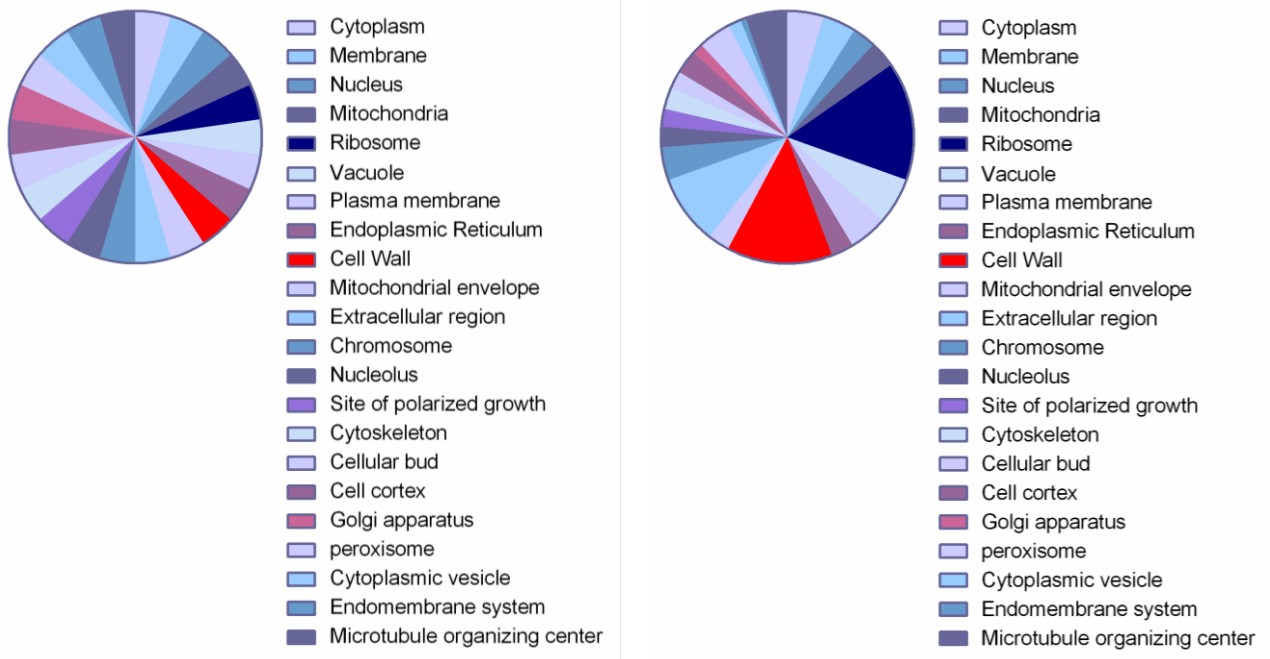

**Figure S1** Gene ontology analysis (GO set: component) of mis-regulation of gene expression in the cohesin mutant *mcd1-1*. **(A)** Pie chart showing percentage of total genes affected for each gene ontology term for various cellular components using data from RNA-seq analysis of DGE of *mcd1-1*. **(B)** Pie charts comparing expected (left) and observed (right) percentage of affected genes with respect to total genes within that category.
