# Supplementary material
Source: publisher figshare collection journal article supplement (https://gsajournals.figshare.com/articles/dataset/_/13308476)
Supplement: Supplementary file 3 [file 1]

**Table S4**

qPCR Primers used in this study

| Primer   | Sequence              |                   |
|----------|-----------------------|-------------------|
| SLO-1040 | TAGGTCAAGACACAGTGTCG  | <i>CHS3</i> RT FP |
| SLO-1041 | CAGGTGATTCATCTGCTCCT  | <i>CHS3</i> RT RP |
| SLO-1042 | AGTACGGTCAGCCAATCTA   | <i>FKS2</i> RT FP |
| SLO-1043 | ATAAGGACCTTGGTCTTG TG | <i>FKS2</i> RT RP |
| SLO-1115 | CTGGTGTTACTGACATCGTT  | <i>PSA1</i> RT FP |
| SLO-1116 | GCAGTACCTAATGGTTCAGT  | <i>PSA1</i> RT RP |
| SLO-1117 | GCGAAGTAAACGGTAAGGAC  | <i>GUK1</i> RT FP |
| SLO-1118 | ACCATAGTAGTTACCGGAGA  | <i>GUK1</i> RT RP |
