# Supplementary material
Source: publisher figshare collection journal article supplement (https://gsajournals.figshare.com/articles/dataset/_/13308476)
Supplement: Supplementary file 4 [file 1]

**Table S3**

Oligonucleotides used in this study

| Primer     | Sequence                                                                        |
|------------|---------------------------------------------------------------------------------|
| SLO-505    | TCACTTCCCTAAGTCCTTCC                                                            |
| SLO-604    | GAAATATTAATAAGACGCCAAACCTGCACTATTTGAAAGGTTTATCAATGCTC<br>GTACGCTGCAGGTCGAC      |
| SLO-612    | GCTTTATTACCAGGGTTGTG                                                            |
| SLO-613    | CTCTGGCTGCTAATGTACC                                                             |
| SLO-791    | CGAGCTCGAATTCATCGAT                                                             |
| SLO-874    | TGGTCAAAGAAAAGACAACCTCAATTGCACAATTACTTTACAAGAAACACGACA<br>ATGCGTACGCTGCAGGTCGAC |
| SLO-892    | TCAAATAGTAGAATAATTGAAGGGCGTGTATAACAATTCTGGGAGATGCGT<br>ACGCTGCAGGTCGAC          |
| SLO-893    | CATCTATGGTGATTCTATACTTCCCCGGTACTTATAGTTTTTTGTCCTAATCG<br>ATGAATTCGAGCTCG        |
| SLO-896    | CTTCCTTGTGTCATATTTAGAC                                                          |
| SLO-941    | GTCGACCTGCAGCGTACG                                                              |
| SLO-1039   | CTTATTGGTGGCAAGTCTTAAACAGTAAGACGTTGAGGATTTTCTGTAACCAT<br>CGATGAATTCTCTGTCG      |
| SL-LEU-L1F | GGAAGCTGAAACGCAAGGATTG                                                          |
| SL-LEU-R3B | ATACTGACGCCGCACAAGCCTA                                                          |
| SLO-1047   | AAAAAGGAACAAAGGGAAAACAGGGAAAACACTACAACCTATCGTATATAATAATG<br>CGTACGCTGCAGGTCGAC  |
| SLO-1048   | ACATCAAAAAGAAGTAAGAATGAGTGGTTAGGGACATTAACAAAACACGTTTA<br>ATCGATGAATTCGAGCTCG    |
| SLO-1049   | TTACAAGAAAATCCAATGC                                                             |
| SLO-1050   | AATGGGCTTTAAAGGTTAGAAAAACGGCTATGATATAATGACCTTGCATGAA<br>CGTACGCTGCAGGTCGAC      |
| SLO-1051   | GGACATTTATCGATTATCGTTTTAGATATTTAAGCATCTGCCCTCTTCTCAA<br>TCGATGAATTCGAGCTCG      |
| SLO-1052   | CTTAGGCTTCGAATGATTTT                                                            |
| SLO-1053   | TTTTTAAAGTCTGATAAAACAAAACAACAAACACAGCTAAATCTCAACAATGC<br>GTACGCTGCAGGTCGAC      |
| SLO-1054   | GAAATAAGATACCATACCTTATCGAGTTATTATGTATGTGTCGAAGCTTTTTAA<br>TCGATGAATTCGAGCTCG    |
| SLO-1055   | CAATGTTAAGTAGTTCTATAAGG                                                         |
| SLO-1056   | TTAAAATAAGCAAGTAGCTGAAATCAAGTCTTTCATACAACGGTCAGACCATG<br>CGTACGCTGCAGGTCGAC     |
| SLO-1057   | TTTGGATAGAATATCAGTAAAATCAAGCGTTCAAGCAAGTATTGATTGTATTAA                          |

|          |                               |
|----------|-------------------------------|
|          | TCGATGAATTCGAGCTCG            |
| SLO-1058 | CATAAACACATTCATATACCT         |
| SLO-1119 | ATCTCGAGCTACTTTTCGTCCTTTCCTGC |
| SLO-1120 | ATGGATCCAGAGGAACTTTACATGTATCC |
| SLO-1121 | ATCTCGAGGAGTAGCTAGAAAAGCAACGG |
| SLO-1122 | ATGGATCCTCAGATACTGGCCCAATATG  |
