# Supplementary material
Source: publisher figshare collection journal article supplement (https://gsajournals.figshare.com/articles/dataset/_/13308476)
Supplement: Supplementary file 5 [file 1]

**Table S6:**

Gene Ontology analysis of deregulation of gene expression in *mcd1-1* with respect to cellular component affected. Results of the Gene Ontology Slim Term Mapper searching for all terms from GO Set: Yeast GO slim: component.

| GO Terms from the cellular component Ontology<br>GO Term (GO ID) | Percentage of total affected genes | Total no. of genes in component | No. of genes affected within component | Affected genes within component (percentage) |
|------------------------------------------------------------------|------------------------------------|---------------------------------|----------------------------------------|----------------------------------------------|
| Cytoplasm (GO:0005737)                                           | 38.92                              | 2549                            | 369                                    | 14.47                                        |
| Membrane (GO:0016020)                                            | 27.53                              | 1972                            | 261                                    | 13.24                                        |
| Nucleus (GO:0005634)                                             | 23.20                              | 2350                            | 220                                    | 9.36                                         |
| Mitochondrion (GO:0005739)                                       | 13.71                              | 1222                            | 130                                    | 10.64                                        |
| Ribosome (GO:0005840)                                            | 12.02                              | 241                             | 114                                    | 47.30                                        |
| Vacuole (GO:0005773)                                             | 10.13                              | 516                             | 96                                     | 18.60                                        |
| Plasma membrane (GO:0005886)                                     | 8.86                               | 549                             | 84                                     | 15.30                                        |
| Endoplasmic Reticulum (GO:0005783)                               | 6.54                               | 683                             | 62                                     | 9.08                                         |
| Cell Wall (GO:0005618)                                           | 6.22                               | 140                             | 59                                     | 42.14                                        |
| Mitochondrial envelope (GO:0005740)                              | 4.11                               | 448                             | 39                                     | 8.71                                         |
| Extracellular region (GO:0005576)                                | 3.38                               | 115                             | 32                                     | 27.83                                        |
| Chromosome (GO:0005694)                                          | 2.95                               | 212                             | 28                                     | 13.21                                        |
| Nucleolus (GO:0005730)                                           | 2.95                               | 347                             | 28                                     | 8.07                                         |
| Site of polarized growth (GO:0030427)                            | 2.11                               | 279                             | 20                                     | 7.17                                         |
| Cytoskeleton (GO:0005856)                                        | 2.00                               | 220                             | 19                                     | 8.64                                         |
| Cellular bud (GO:0005933)                                        | 1.90                               | 257                             | 18                                     | 7.00                                         |
| Cell cortex (GO:0005938)                                         | 1.69                               | 170                             | 16                                     | 9.41                                         |
| Golgi apparatus (GO:0005794)                                     | 1.37                               | 297                             | 13                                     | 4.38                                         |
| Peroxisome (GO:0005777)                                          | 1.27                               | 91                              | 12                                     | 13.19                                        |
| Cytoplasmic vesicle (GO:0031410)                                 | 0.74                               | 136                             | 7                                      | 5.15                                         |
| Endomembrane system (GO:0012505)                                 | 0.21                               | 92                              | 2                                      | 2.17                                         |
| Microtubule organizing center (GO:0005815)                       | 0.11                               | 6                               | 1                                      | 16.67                                        |
| All terms                                                        | -                                  | 6430                            | 948                                    | 14.74                                        |
