# Supplementary material
Source: publisher figshare collection journal article supplement (https://gsajournals.figshare.com/articles/dataset/_/13308476)
Supplement: Supplementary file 6 [file 1]

## Supplementary material

**Table S1**

Yeast strains used in this study

| Strain   | Genotype                                                                                                                                                                                                 | Source/Ref.                 | Strain background |
|----------|----------------------------------------------------------------------------------------------------------------------------------------------------------------------------------------------------------|-----------------------------|-------------------|
| SLY2199  | <i>MAT<math>\alpha</math> RAD5 ade2-1 ura3-1 trp1-1 leu2-3,112 his3-11,15 can1-100 hmr<math>\Delta</math>E::TRP1 RDN1::ADE2-CAN1 TELVR::URA3-TEL leu2::MCD1 natNT2 mcd1<math>\Delta</math>::hphNT1</i>   | This study                  | W303              |
| SLY2200  | <i>MAT<math>\alpha</math> RAD5 ade2-1 ura3-1 trp1-1 leu2-3,112 his3-11,15 can1-100 hmr<math>\Delta</math>E::TRP1 RDN1::ADE2-CAN1 TELVR::URA3-TEL leu2::mcd1-1 natNT2 mcd1<math>\Delta</math>::hphNT1</i> | This study                  | W303              |
| VG906-1A | <i>MAT<math>\alpha</math> bar1 trp1 leu2 gal1</i>                                                                                                                                                        | (GUACCI <i>et al.</i> 1997) | A364A             |
| VG955-7D | <i>MAT<math>\alpha</math> mcd1-1 bar1 trp1 leu2 gal1</i>                                                                                                                                                 | (GUACCI <i>et al.</i> 1997) | A364A             |
| 1355-1A  | <i>MAT<math>\alpha</math> bar1 smc1-2::LEU2 trp1 leu2 gal1</i>                                                                                                                                           | D. Koshland                 | A364A             |
| ROY951   | <i>MAT<math>\alpha</math> ade2-1 LYS2 HMRDI leu2-3,112 his3-11,15 ura3-1 trp1-1</i>                                                                                                                      | (DONZE <i>et al.</i> 1999)  | W303              |
| ROY1060  | <i>MAT<math>\alpha</math> ade2-1 LYS2 HMRDI leu2-3,112 his3-11,15 ura3-1 trp1-1 smc3-1::LEU2</i>                                                                                                         | (DONZE <i>et al.</i> 1999)  | W303              |
| W303-1a  | <i>MAT<math>\alpha</math> leu2-3,112 trp1-1 can1-100 ura3-1 ade2-1 his3-11,15</i>                                                                                                                        |                             | W303              |
| SLY2764  | <i>MAT<math>\alpha</math> leu2-3,112 trp1-1 can1-100 ura3-1 ade2-1 his3-11,15 leu2::MCD1 natNT2 mcd1<math>\Delta</math>::TRP1</i>                                                                        | This study                  | W303              |
| SLY2767  | <i>MAT<math>\alpha</math> leu2-3,112 trp1-1 can1-100 ura3-1 ade2-1 his3-11,15 leu2::mcd1-1 natNT2 mcd1<math>\Delta</math>::TRP1</i>                                                                      | This study                  | W303              |
| SLY2799  | W303-1a natNT2::GALL-3HA-MCD1                                                                                                                                                                            | This study                  | W303              |
| SLY2790  | <i>MAT<math>\alpha</math> bar1 trp1 leu2 gal1 CLB2-3HA::TRP1</i>                                                                                                                                         | This study                  | VG906-1A          |
| SLY2792  | <i>MAT<math>\alpha</math> mcd1-1 bar1 trp1 leu2 gal1 CLB2-3HA::TRP1</i>                                                                                                                                  | This study                  | VG955-7D          |

|         |                                                                                                                                                                    |                                      |          |
|---------|--------------------------------------------------------------------------------------------------------------------------------------------------------------------|--------------------------------------|----------|
| yYB3476 | <i>MATa ura3-52 his3Δ200 leu2 lys2-801 ade2-101 trp1Δ63 trp1::TetO:TRP1 lys4::LacO:LEU2 his3::LacR-GFP:HIS3 TetR-mRFP</i>                                          | (NEUROHR <i>et al.</i> 2011)         | S288c    |
| SLY2553 | <i>yYB3476 leu2::MCD1 natNT2 mcd1Δ::kanMX4</i>                                                                                                                     | This study                           | S288c    |
| SLY2555 | <i>yYB3476 leu2::mcd1-1 natNT2 mcd1Δ::kanMX4</i>                                                                                                                   | This study                           | S288c    |
| SLY2865 | <i>MATa leu2-3,112 trp1-1 can1-100 ura3-1 ade2-1 his3-11,15 leu2::MCD1 natNT2 mcd1Δ::TRP1 hog1Δ::HIS3</i>                                                          | This study                           | W303     |
| SLY2867 | <i>MATa leu2-3,112 trp1-1 can1-100 ura3-1 ade2-1 his3-11,15 leu2::mcd1-1 natNT2 mcd1Δ::TRP1 hog1Δ::HIS3</i>                                                        | This study                           | W303     |
| SLY2869 | <i>MATa leu2-3,112 trp1-1 can1-100 ura3-1 ade2-1 his3-11,15 leu2::MCD1 natNT2 mcd1Δ::TRP1 mpk1Δ::HIS3</i>                                                          | This study                           | W303     |
| SLY2871 | <i>MATa leu2-3,112 trp1-1 can1-100 ura3-1 ade2-1 his3-11,15 leu2::mcd1-1 natNT2 mcd1Δ::TRP1 mpk1Δ::HIS3</i>                                                        | This study                           | W303     |
| SLY2666 | <i>MATa bar1 trp1 leu2 gal1 SIR3-6HA:hphNT1 mpk1Δ::natNT2</i>                                                                                                      | This study                           | VG906-1A |
| SLY2668 | <i>MATa mcd1-1 bar1 trp1 leu2 gal1 SIR3-6HA:hphNT1 mpk1Δ::natNT2</i>                                                                                               | This study                           | VG955-7D |
| SLY2934 | <i>MATa bar1 trp1 leu2 gal1 fks1Δ:: natNT2</i>                                                                                                                     | This study                           | VG906-1A |
| SLY2936 | <i>MATa mcd1-1 bar1 trp1 leu2 gal1 fks1Δ:: natNT2</i>                                                                                                              | This study                           | VG955-7D |
| SLY2938 | <i>MATa bar1 trp1 leu2 gal1 gas1Δ:: natNT2</i>                                                                                                                     | This study                           | VG906-1A |
| SLY2940 | <i>MATa mcd1-1 bar1 trp1 leu2 gal1 gas1Δ:: natNT2</i>                                                                                                              | This study                           | VG955-7D |
| JH5275b | <i>MataΔ::Hygromycin hoΔ hml1Δ::ADE1 hmrΔ::ADE1 ade1-110 leu2,3-112:MCD1-LEU2 lys5trp1::hisG ura3-52 ade3::GAL10:HO met17::trna-SUP53-G418 mcd1Δ::NAT</i>          | (HEIDINGER-PAULI <i>et al.</i> 2010) | JKM      |
| JH5276b | <i>MataΔ::Hygromycin hoΔ hml1Δ::ADE1 hmrΔ::ADE1 ade1-110 leu2,3-112:mcd1(L12STOP)-LEU2 lys5trp1::hisG ura3-52 ade3::GAL10:HO met17::trna-SUP53-G418 mcd1Δ::NAT</i> | (HEIDINGER-PAULI <i>et al.</i> 2010) | JKM      |

|         |                                                                                                                                                                                              |                                             |          |
|---------|----------------------------------------------------------------------------------------------------------------------------------------------------------------------------------------------|---------------------------------------------|----------|
| JH5277b | <i>MataΔ::Hygromycin hoΔ hml1Δ::ADE1<br/>hmrΔ::ADE1 ade1-110 leu2,3-<br/>112:mcd1(L12STOP, L21STOP)-LEU2<br/>lys5trp1::hisG ura3-52 ade3::GAL10:HO<br/>met17::trna-SUP53-G418 mcd1Δ::NAT</i> | (HEIDINGER-<br>PAULI <i>et al.</i><br>2010) | JKM      |
| SLY2794 | <i>MATa bar1 trp1 leu2 gal1 MPK1-3HA:TRP1</i>                                                                                                                                                | KOTHIWAL<br>AND<br>LALORAYA<br>2019         | VG906-1A |
| SLY2796 | <i>MATa mcd1-1 bar1 trp1 leu2 gal1 MPK1-<br/>3HA:TRP1</i>                                                                                                                                    | KOTHIWAL<br>AND<br>LALORAYA<br>2019         | VG955-7D |
