# Supplementary material
Source: publisher figshare collection journal article supplement (https://gsajournals.figshare.com/articles/dataset/_/13308476)
Supplement: Supplementary file 7 [file 1]

**Table S2**

Plasmids used in this study

|           |                                                  |                                      |
|-----------|--------------------------------------------------|--------------------------------------|
| YEplac195 | 2 $\mu$ , <i>URA3</i>                            | (HELLIWELL <i>et al.</i> 1998)       |
| pPKC1     | pSEY18:: <i>PKC1</i> (2 $\mu$ , <i>URA3</i> )    | (HELLIWELL <i>et al.</i> 1998)       |
| pPKC1*    | YCp50:: <i>PKC1</i> (R398P) (CEN, <i>URA3</i> )  | (HELLIWELL <i>et al.</i> 1998)       |
| pMPK1     | YEplac195:: <i>MPK1</i> (2 $\mu$ , <i>URA3</i> ) | (HELLIWELL <i>et al.</i> 1998)       |
| pNB83     | YEplac195:: <i>SKN7</i> (2 $\mu$ , <i>URA3</i> ) | (HELLIWELL <i>et al.</i> 1998)       |
| pYO326    | 2 $\mu$ , <i>URA3</i>                            | (SEKIYA-KAWASAKI <i>et al.</i> 2002) |
| pYO965    | pRS316:: <i>RHO1</i> (Q68L) (CEN, <i>URA3</i> )  | (SEKIYA-KAWASAKI <i>et al.</i> 2002) |
| pYO1835   | pYO326:: <i>RHO1</i> (2 $\mu$ , <i>URA3</i> )    | (SEKIYA-KAWASAKI <i>et al.</i> 2002) |
| pYO2358   | pYO326:: <i>FKS1</i> (2 $\mu$ , <i>URA3</i> )    | (SEKIYA-KAWASAKI <i>et al.</i> 2002) |
| pYO2361   | pYO326:: <i>MID2</i> (2 $\mu$ , <i>URA3</i> )    | (SEKIYA-KAWASAKI <i>et al.</i> 2002) |
| pYO2364   | pYO326:: <i>WSC1</i> (2 $\mu$ , <i>URA3</i> )    | (SEKIYA-KAWASAKI <i>et al.</i> 2002) |
| pYO2366   | pYO326:: <i>ROM2</i> (2 $\mu$ , <i>URA3</i> )    | (SEKIYA-KAWASAKI <i>et al.</i> 2002) |
| pDK42     | pRS425:: <i>PSA1</i> (2 $\mu$ , <i>LEU2</i> )    | This study                           |
| pSW1      | pRS422:: <i>PSA1</i> (2 $\mu$ , <i>ADE2</i> )    | This study                           |
| pSW2      | pRS422:: <i>GUK1</i> (2 $\mu$ , <i>ADE2</i> )    | This study                           |
