# Supplementary material
Source: publisher figshare collection journal article supplement (https://gsajournals.figshare.com/articles/dataset/_/13308476)
Supplement: Supplementary file 8 [file 1]

**Table S5:**

Gene Ontology analysis of deregulation of gene expression in *mcd1-1* with respect to biological processes affected. Results of the Gene Ontology Slim Term Mapper searching for all terms from GO Set: Yeast GO slim: process.

| GO Terms from the biological process Ontology<br>GO Term (GO ID) | Percentage of total affected genes | Total no. of genes in process | No. of genes affected within process | Affected genes within process (percentage) |
|------------------------------------------------------------------|------------------------------------|-------------------------------|--------------------------------------|--------------------------------------------|
| Cytoplasmic translation (GO:0002181)                             | 12.09                              | 206                           | 115                                  | 55.83                                      |
| Transmembrane transport (GO:0055085)                             | 8.94                               | 459                           | 85                                   | 18.52                                      |
| Meiotic cell cycle (GO:0051321)                                  | 8.62                               | 323                           | 82                                   | 25.39                                      |
| Cell wall organization and biogenesis (GO:0071554)               | 7.26                               | 299                           | 69                                   | 23.08                                      |
| Carbohydrate metabolic process (GO:0005975)                      | 6.83                               | 248                           | 65                                   | 26.21                                      |
| Response to chemical (GO:0042221)                                | 6.83                               | 552                           | 65                                   | 11.78                                      |
| rRNA processing (GO:0006364)                                     | 6.1                                | 359                           | 58                                   | 16.16                                      |
| Ion transport (GO:0006811)                                       | 5.99                               | 359                           | 57                                   | 15.88                                      |
| Sporulation (GO:0043934)                                         | 5.89                               | 170                           | 56                                   | 32.94                                      |
| Monocarboxylic metabolic process (GO:0032787)                    | 4.73                               | 174                           | 45                                   | 25.86                                      |
| All terms                                                        | -                                  | 6439                          | 951                                  | 14.77                                      |

List of GO term process – top 10 categories are shown here (Total affected categories - 96)
